# Supplementary material for: Potential Anticancer Mechanisms of a Novel EGFR/DNA-Targeting Combi-Molecule (JDF12) against DU145 Prostate Cancer Cells: An iTRAQ-Based Proteomic Analysis
Source: Biomed Res Int. 2017 Oct 15;2017:8050313. doi: 10.1155/2017/8050313 (PMC5661095; doi:10.1155/2017/8050313)
Supplement: Supplementary file 1 — The effects of JDF12 on other cell lines as well as Go analysis of JDF12 on DU145 cells. [file 8050313.f1.pdf]

## Supplementary materials

### Potential Anticancer Mechanisms of a Novel EGFR/DNA-targeting Combi-molecule (JDF12) against DU145 Prostate Cancer Cells: An iTRAQ-based Proteomic Analysis

Haofeng Zheng<sup>1a</sup>, Guancan Liang<sup>1a</sup>, Yanxiong Chen<sup>1</sup>, Sijie Lin<sup>1</sup>, Wei Liu<sup>2</sup>,  
Youqiang Fang<sup>1\*</sup>

<sup>1</sup>Department of Urology, the Third Affiliated Hospital of Sun Yat-Sen University, Guangzhou, 510630, China.

<sup>2</sup>Guangdong Provincial Key Laboratory of Liver Disease Research, the Third Affiliated Hospital of Sun Yat-Sen University, Guangzhou, 510630, China.

**\*Corresponding author.**

Department of Urology, The Third Affiliated Hospital of Sun Yat-sen University, 600W Tianhe Road, Guangzhou 510630, China.

Tel. +86 20 85252052; Fax: +86 20 85252678.

Email: [fangyq@mail.sysu.edu.cn](mailto:fangyq@mail.sysu.edu.cn) .

<sup>a</sup> These authors contributed to this paper equally.

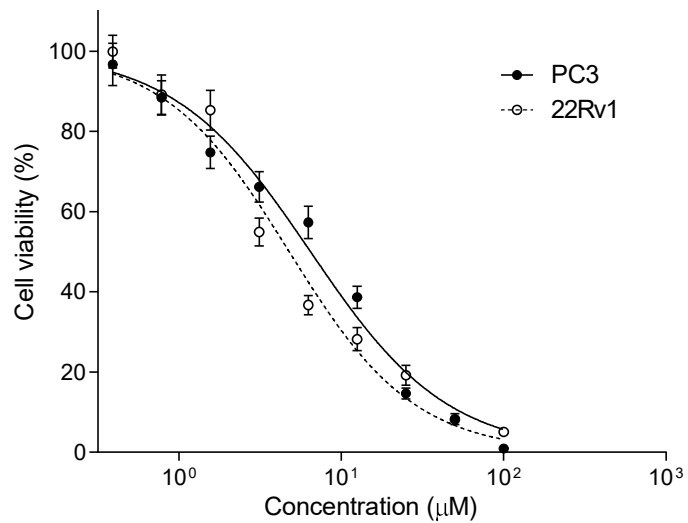

**Supplemental Figure 1** The effects of JDF12 on the cell viability for PC3 and 22Rv1 cell lines at 48h.  $\text{IC}_{50}$  for PC3 is  $6.45 \pm 0.43 \mu\text{M}$ , and for 22Rv1 is  $4.77 \pm 0.28 \mu\text{M}$ . Data was expressed as mean  $\pm$  SD of 5 determinations from three independent experiments.

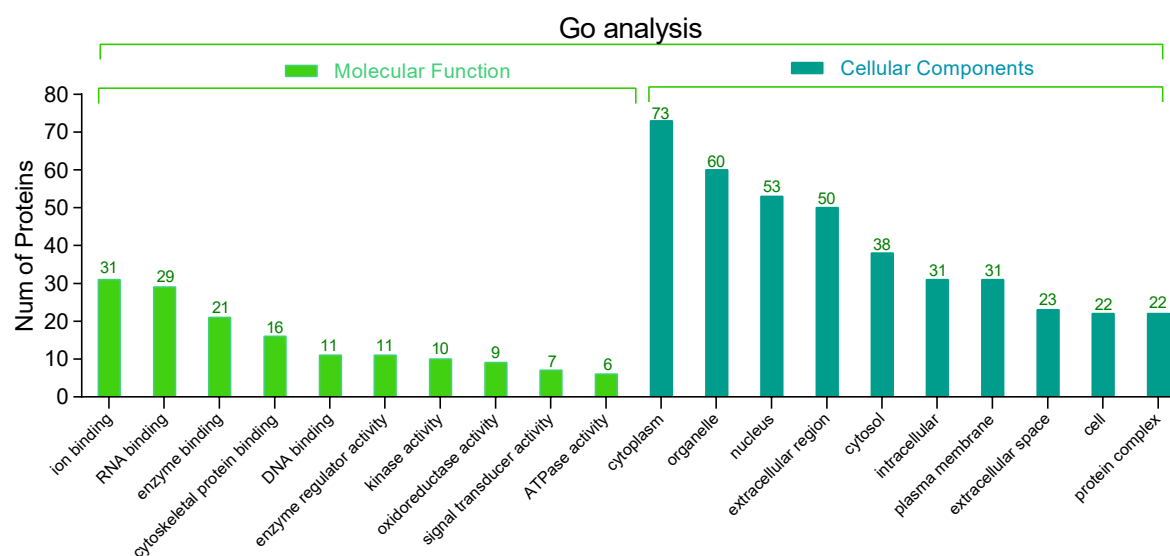

**Supplemental Figure 2** The functional classification of differentially expressed proteins using Go analysis (Molecular Function and Cellular Components views)
